# Supplementary material for: Deletion in a gene associated with grain size increased yields during rice domestication
Source: Springer Nature journal article supplement (doi:10.1038/ng.169), 2008-07-06
Supplement: 41588_2008_BFng169_MOESM4_ESM.pdf [file 41588_2008_BFng169_MOESM4_ESM.pdf]

## Supplementary Note

Considering the propagation of rice cultivation areas, we expect that other genes were also involved in the adaptation of landraces within local areas in addition to the three major domestication-related genes involved in *japonica* rice domestication. Number of grains per panicle could have been a target trait for local adaptation in rice domestication. *Gn1a*, involved in grain number, has been cloned through natural variation between an *indica* cultivar, Habataki, and a temperate *japonica* cultivar, Koshihikari, and shown to encode a cytokinin oxidase<sup>24</sup>. In this case, the Habataki-type allele was defective. There is so far no evidence that *Gn1a* was a domestication-related gene. Therefore, we partly sequenced *Gn1a* in our rice collections and found that the major allele in the “heritage” landraces was distinct from both the defective *indica* allele and the reportedly functional Koshihikari allele (**Supplementary Fig. 7a, b** on line). The Koshihikari allele became a major allele in rice landraces produced after crossing of the *qsw5* and *wx* mutations, but only in the temperate *japonica* group (especially in Japanese landraces) (**Supplementary Fig. 6 and 7** online). It was likely that fixation of the Koshihikari allele occurred in this case of *Gn1a*, since the Koshihikari allele existed in the “heritage” landraces as a minor allele as well as in *qsw5* and *wx* landraces. It is possible that the current Koshihikari allele was favored during domestication, since it may be a weaker *Gn1a* allele than the original *Gn1a* allele that we found in the “heritage” landraces. This example in *Gn1a* may imply that more genes were involved in rice domestication from the point of view of local adaptation.

There have been several distinct models of the local origin of *japonica* domesticated rice. In such models, the China and Bengal areas have been proposed as points of origin<sup>6,7</sup>. Our results, however, strongly suggest that the origin was a different area. Although ancestral rice with all functional alleles of the three domestication-related genes might be distributed throughout the tropical areas of Asia, landraces with naturally occurring mutations in the domestication-related genes were likely to have propagated to broader areas from the local areas of origin. Therefore, in these local areas of origin, “heritage” landraces and landraces with a single mutation among the FNPs are still being grown at the moment. Furthermore, landraces with single mutations, such as those of *qsw5* and *wx*, were likely to have been distributed over broader areas along with the propagation of rice cultivation. This distribution of landraces with the single defective FNPs, *qsw5* and *wx*, could be seen to occur in accordance with the gradual changes in the RFLP genome pattern (**Fig. 3b** and **Supplementary Figs. 4, 5** online). Considering the adaptation of landraces to local areas, very rapid migration of the landraces was unlikely. These results indicate that the process of domestication of *japonica* rice was complex but divided into the several key events (**Supplementary Fig. 6** online); it was a process of fixation of segregating loci in local groups from the original “heritage” alleles to Nipponbare-type alleles in accordance with expansion in the area of cultivation of rice to Far Eastern Asia. Nipponbare is a modern Japanese cultivar typical of the temperate *japonica* group, and the temperate *japonica* subgroup was imported into Japan about

3000 years ago through China and/or Korea<sup>6, 7, 13</sup>.

In these processes, our analysis of the genome RFLP patterns of the *japonica* landraces failed to find any landraces derived from crossings between relatively distant ancient rice intermediates, with the exception of some landraces of Japanese upland rice and of Bangladesh, which had some additional Kasalath-type alleles in some loci around the genome (**Supplementary Fig. 5**). Note that crossings between genetically distant rice landraces must have made brand-new mixed genome structures. These observations in *japonica* landraces indicated that gradual changes in genome structures occurred in accordance with fixation to Nipponbare-type alleles in the segregating loci among local subgroups during *japonica* rice domestication. Therefore, it is still possible that some other, unidentified, loci may have been selected and favored to fix to the selected allele in terms of local adaptation processes, as was the case with *Gn1a* (**Supplementary Fig. 7** on line). Therefore, we concluded that *japonica* cultivated rice was largely domesticated with the combined selection of the three major FNPs in the domestication-related genes and with gradual fixation of alleles (sometimes favored ones) at various loci genome-wide in relative crossings and selfings, but not by crossings between distant ancient intermediates (**Supplementary Fig. 6** on line).

Another domestication-related gene for seed shattering, termed *sh4*, has also been reported<sup>12</sup>. All tested cultivars, including *japonica* and *indica* rice, contain the defective *sh4* allele. We therefore

confirmed that several accessions (W1954, W1958, and W1976) of *O. rufipogon* that were very close to *japonica* rice<sup>21</sup> already had the defective allele (data not shown). This indicates that the *sh4* defective allele was a standing natural variation in wild species and was selected at the very beginning of *japonica* rice domestication for its reduction in seed shattering traits. Further analysis of wild rice remains to address this question in more detail.

In addition, we demonstrated that during *indica* rice domestication, ancient humans did not utilize the same defective alleles of the three domestication genes at all to form the current *indica* rice landraces, although some modern *indica* cultivars may have the same alleles as a result of recent inbreeding. This fact strongly suggests that, in a future breeding program, the reuse of these alleles in an *indica* background may provide a chance to produce new rice cultivars improved through higher yield and quality (**Table 2, Fig. 2h**).

## References

24. Ashikari, M. et al. Cytokinin oxidase regulates rice grain production. *Science* **309**, 741–745 (2005).

## Supplementary Fig.1

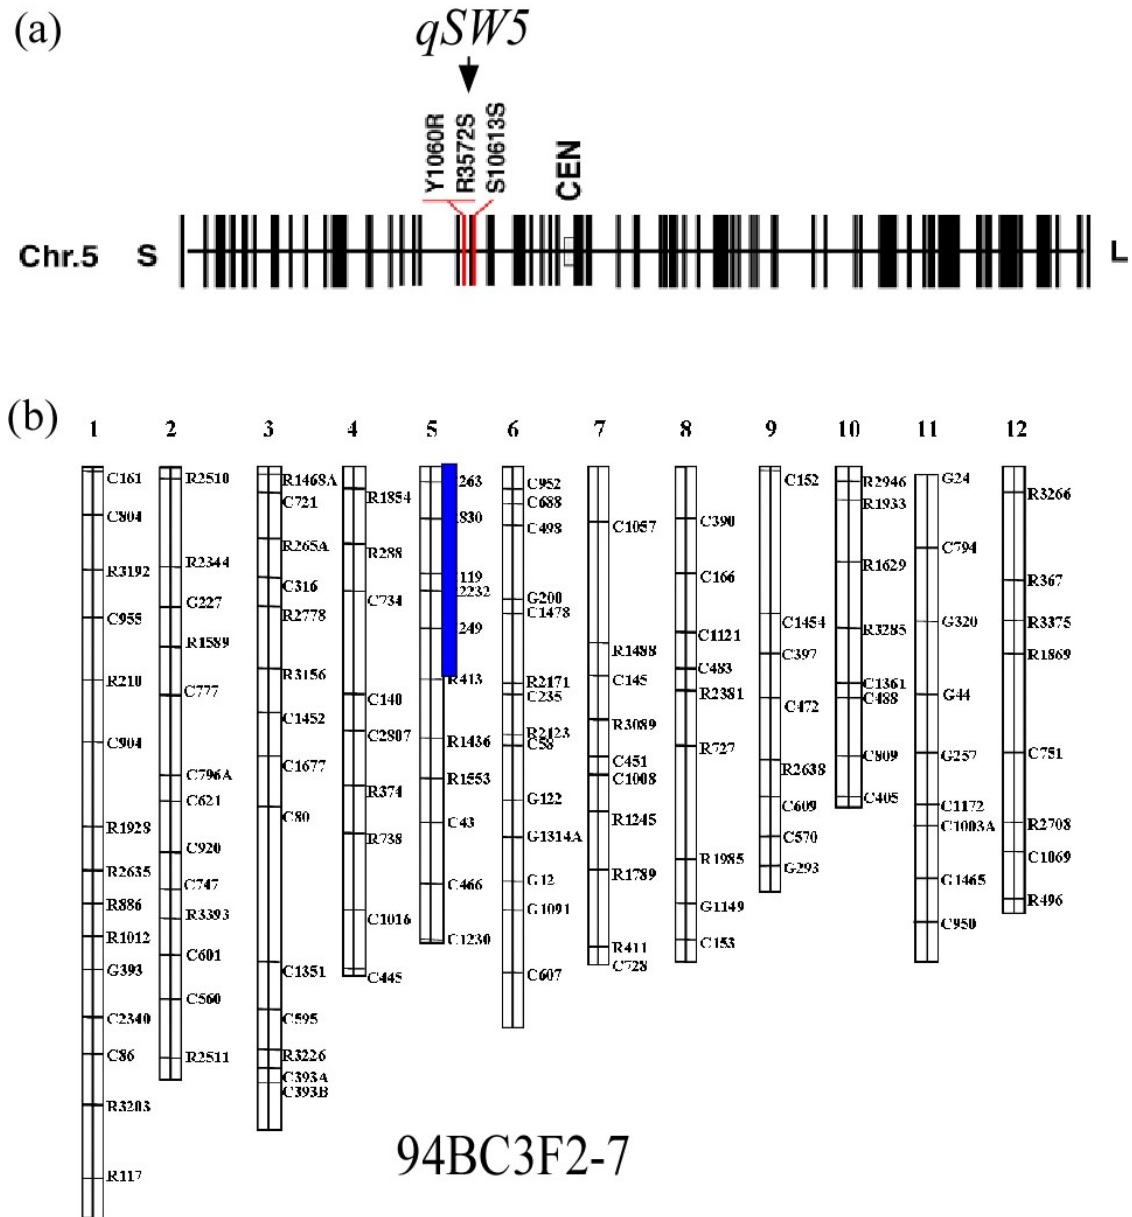

**Supplementary Fig. 1 Rough map of *qSW5* and materials used in this work.** (a) Rough map position of *qSW5* flanking the primary DNA markers Y1060R and S10613S. R3572S was a cosegregating DNA marker. (b) Graphical genotype of the original material used for fine mapping of *qSW5*. Markers used for the genome-wide genotype data collection are indicated on the

chromosomes.

## Supplementary Fig.2

| Line1       | Thin | Normal |
|-------------|------|--------|
| Transgene + | 16   | -      |
| Transgene - | -    | 3      |
| Line2       | Thin | Normal |
| Transgene + | 11   | -      |
| Transgene - | -    | 1      |
| Line3       | Thin | Normal |
| Transgene + | 18   | -      |
| Transgene - | -    | -      |
| Line4       | Thin | Normal |
| Transgene + | 18   | 1      |
| Transgene - | -    | 1      |

**Supplementary Fig. 2 Complementation test in T<sub>1</sub> generation.** Progeny of four independent

transgenic plants that exhibited thinner seed grains in the T<sub>0</sub> generation were grown. Presence of the introduced transgene was checked by PCR, and the seed grain widths of T<sub>1</sub> plants were examined. Seed width was clearly segregated in the progeny. Note that it was easy to judge the phenotypes of T<sub>2</sub> seeds at first glance, since all T<sub>2</sub> seeds from a T<sub>1</sub> plant exhibited the same phenotype. A clear association of transgene presence with the phenotype was observed, except in one plant in Line 4, among the 69 T<sub>1</sub> plants tested. Numbers of T<sub>1</sub> plants are presented. Thin: T<sub>1</sub> plants with a thinner T<sub>2</sub> seed width than in Nipponbare. Normal: T<sub>1</sub> plants with the same T<sub>2</sub> seed width as in Nipponbare.

Supplementary Fig. 3

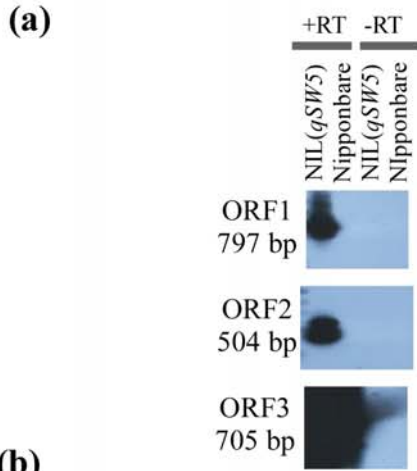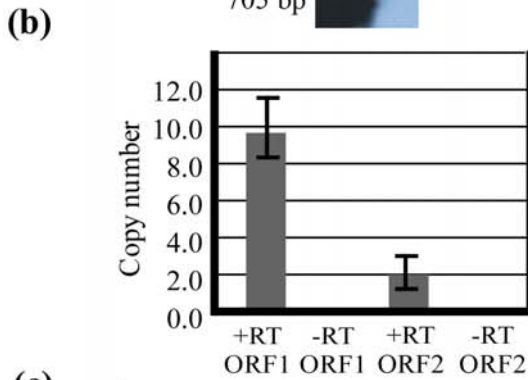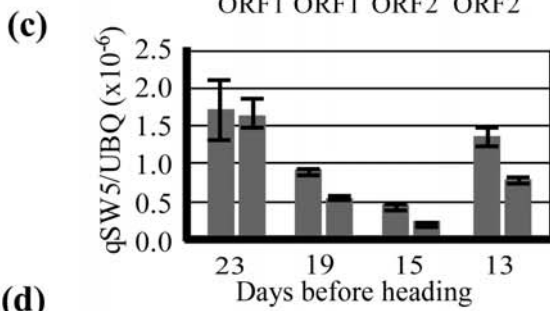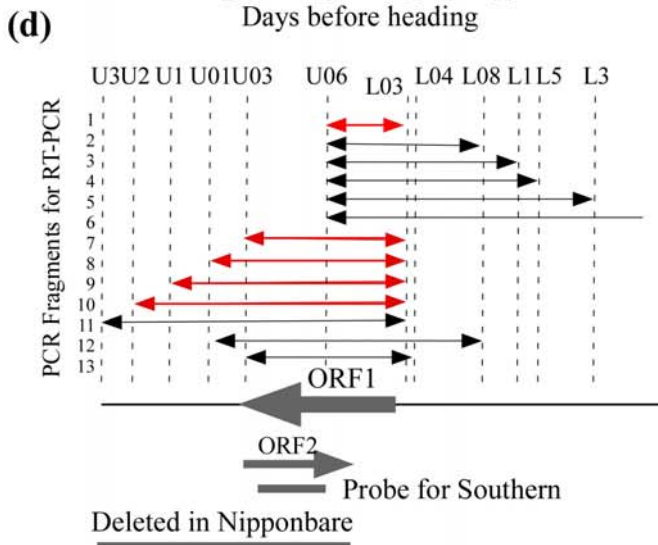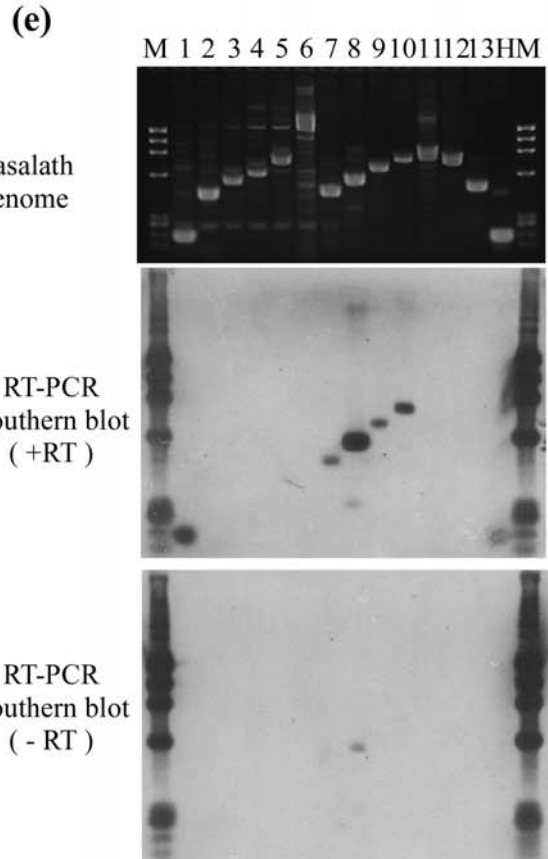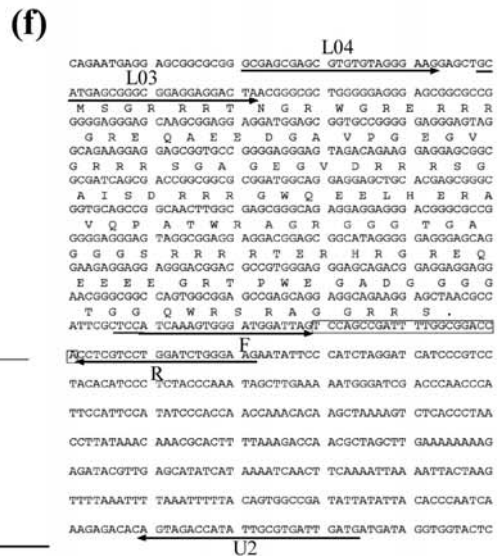



**Supplementary Fig. 3 *qSW5* expression analysis and identification of *qSW5* transcripts. (a)**

Three ORFs (as shown in **Fig. 2d**) were examined by RT-PCR following Southern hybridization analysis to determine the real *qSW5* transcript. ORF1 and 2 were expressed only in NIL(*qSW5*) samples positive for reverse transcriptase. RT +, treated with reverse transcriptase; RT -, not treated with reverse transcriptases. RNA samples were prepared from developing young panicles at about 20 days before heading. **(b)** Confirmation of direction of *qSW5* transcription. ORF1 and ORF2 were predicted in opposite directions from the same genomic region (Fig. 2d). To confirm the direction of transcription, we performed a biased RT-PCR with the same RNA samples as in **a**. Only one primer “F” or “R” hybridized with ORF1 or ORF2 first-strand cDNA, respectively, was used in the first 20 cycles of the PCR reaction, followed by a typical Taq-Man PCR cycle with both primers and a probe (as shown in **f**). Predicted ORF1 mRNA made up the majority of the transcript. RT+, treated with reverse transcriptase; RT-, not treated with reverse transcriptases. **(c)** ORF1 mRNA expression by Taq-man quantitative RT-PCR. RNA samples were prepared from developing panicles at different stages judged by date relative to heading date. Relative *qSW5* mRNA expression was normalized against a ubiquitin gene. Two biological replicates were measured three times. **(d)** Schematic positions of primers for RT-PCR. Short gray line indicates position of the probe used for Southern analysis after RT-PCR. Red arrows correspond to the positive signals shown in the middle panel of **e**. **(e)** Results of RT-PCR for ORF1. Row numbers correspond to the PCR fragments in **d**. Top: Genome control to confirm amplification under the same PCR conditions.

Kasalath genomic DNA was used. Middle: RT-PCR followed by Southern blot analysis. mRNA samples were treated with reverse transcriptases (+RT). Bottom: RT-PCR followed by Southern blot analysis. mRNA samples were not treated with reverse transcriptases (-RT). H: RT-PCR control for histone cDNA. M: molecular DNA size markers. (f) cDNA sequence amplified by RT-PCR. cDNA was amplified by using primers L03 and U2, not primers L04 and U2. Predicted amino acid sequences of ORF1 (the qSW5 candidate protein) are shown with the DNA sequence. Primers (R and F) and probe for qRT-PCR (Taq-Man PCR) are indicated by arrows and the box, respectively.

Supplementary Fig.4

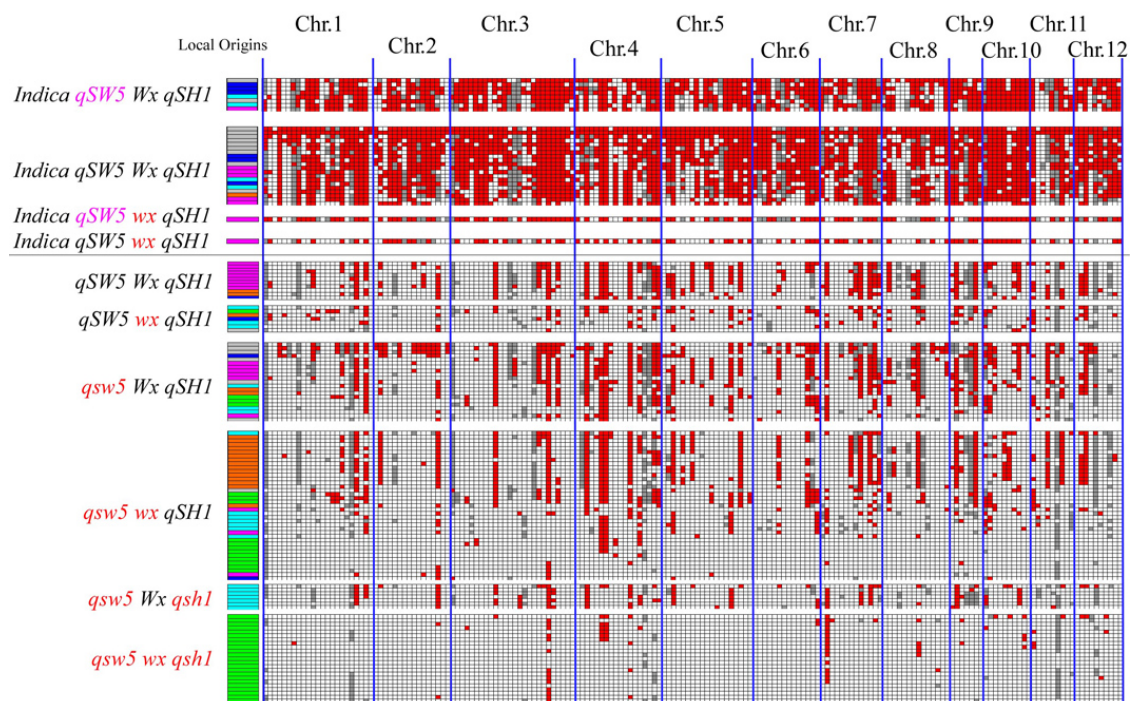

Supplementary Fig. 4 RFLP data at 179 loci among all 12 chromosomes for three

**domestication genotypes.** RFLP genotyping data for 141 landraces. Local origins are presented by bars of the same colors as in Fig. 3b. Each small square represents the genotype of an RFLP marker of a landrace. RFLP markers are aligned in the physical order of the chromosomes as shown at the top of the figure. Red squares indicate Kasalath alleles, white indicate Nipponbare, and grey indicate other types. Data for a landrace termed Danyu1 was removed owing to its complicated introgression between *indica* and *japonica*. The increase in the number of white squares was associated with gradual genomic changes to typical temperate *japonica*. These gradual genome changes clearly indicate that crossings between evolutionarily distant wild species (or intermediate landraces) did not occur during the rice domestication process, although crossings between relatives might have occurred (see also **Fig. 3c**). A *qSW5* allele found in *indica* (pink) corresponds to *indica* II-type in **Fig. 2g**. This allele did not affect the grain width clearly in the association analysis (**Fig. 2g**).

Supplementary Fig.5

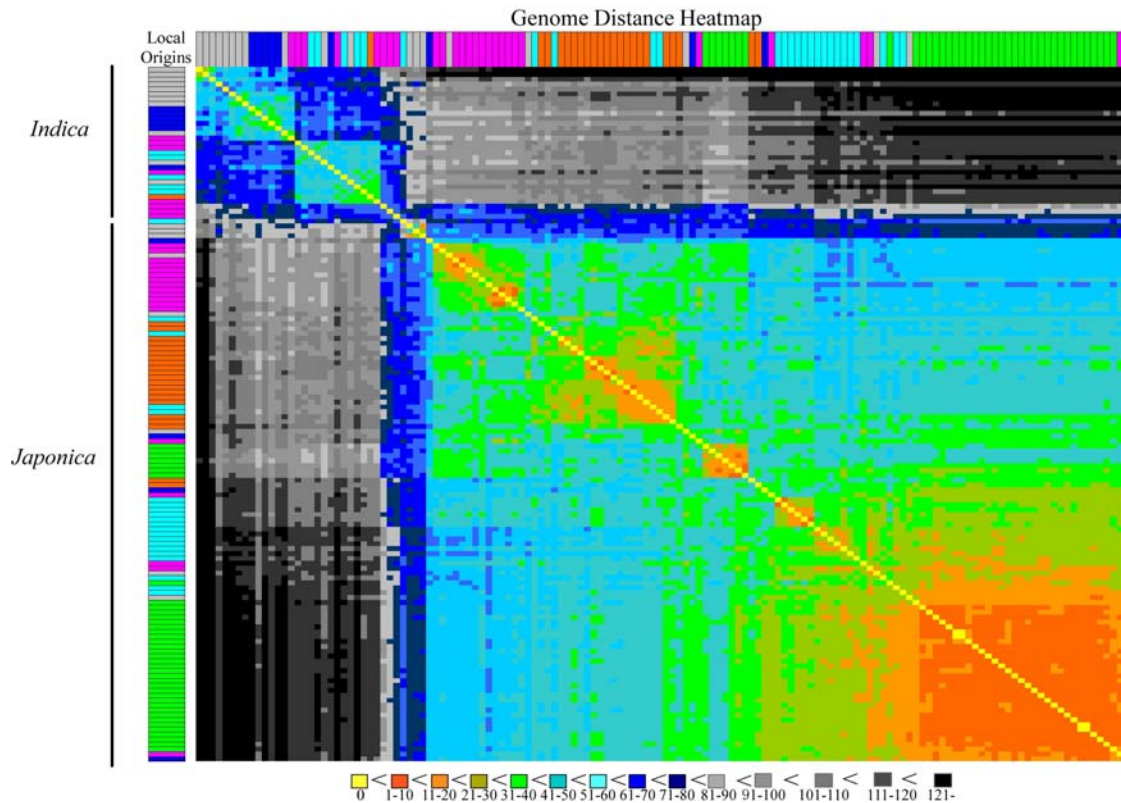

**Supplementary Fig. 5 Genome distance heatmap with local origins represented by colors.**

Genome distances for all possible pairwise comparisons of 142 tested landraces (including a few modern cultivars) were calculated, and the genetic distance scores were used for clustering.

Primarily, pvclust R software with an averaging method was used, and the results were fine-tuned manually. Colors in the heatmap indicate genome distances, as indicated at the bottom, from other

landraces tested. A genome distance of 0 means that the RFLP patterns are identical at 179 loci. The

order of landraces was determined by landrace alignment according to the relative genome

similarities calculated by the RFLP patterns shown in Supplementary Fig. 4. Association of

landrace order with local origin is apparent, indicating that clustering and alignment based on

genome similarity reflect the history of the propagation of rice cultivation. These landraces were largely classified into two groups, *indica* and *japonica*, with the exception of one termed Danyu1. The local origins of each landrace are indicated by color bars corresponding to the colors in **Fig. 3a**. See also **Supplementary Table 2** for details.

Supplementary Fig.6

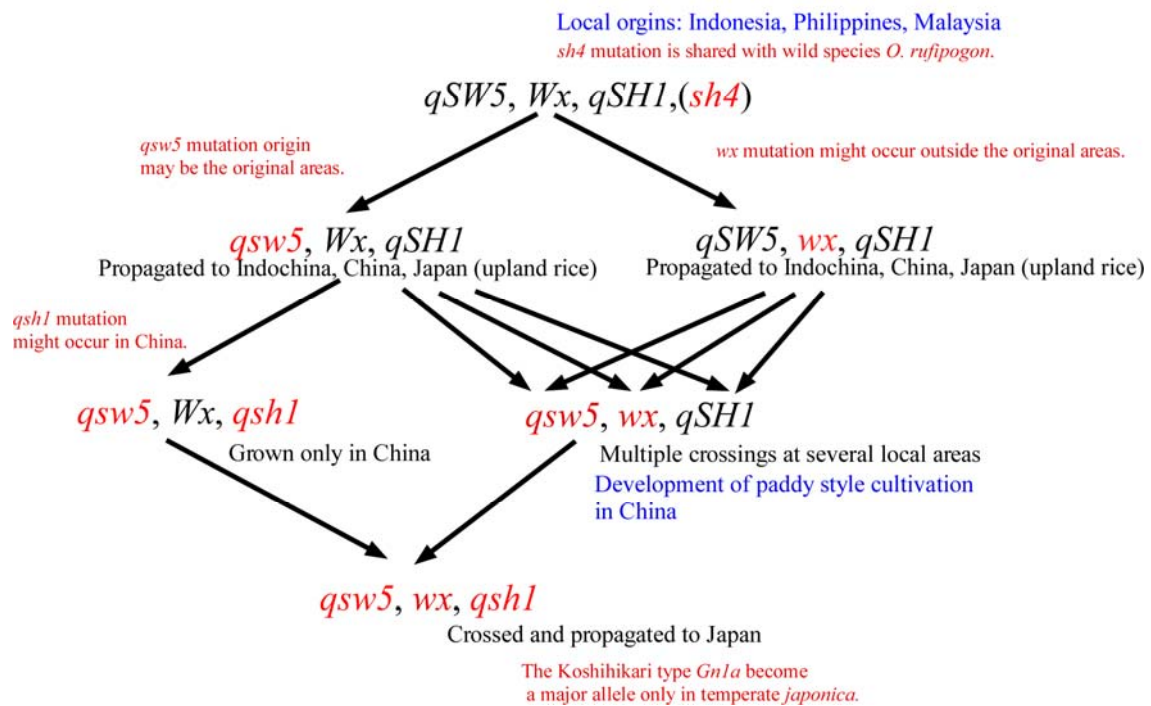

**Supplementary Fig. 6 A model for japonica rice domestication.** The local origin of ancient *japonica* rice was successfully assigned with domestication-related gene profiles. Propagation of each defective allele of *wx* and *qsw5* into the broader Asian area in accordance with local adaptation, and allele combination by natural crossing in several local areas, were key events in this

*japonica* domestication. Note that multiple independent crossings between *qsw5* single and *wx* single lines in several local areas are implicit in rice domestication.

Supplementary Fig.7

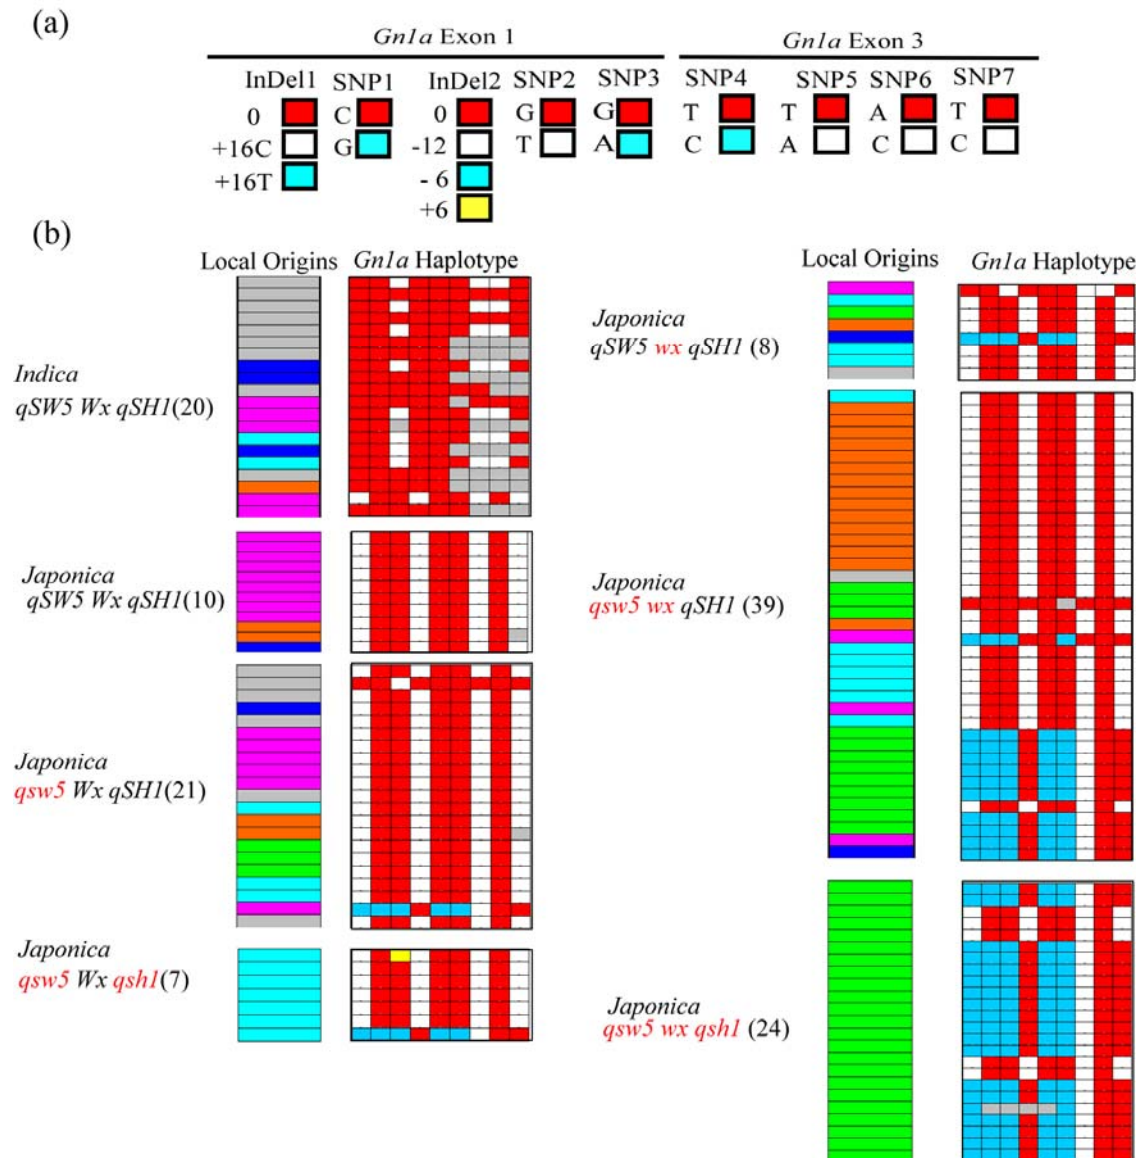

Supplementary Fig. 7 How were *Gn1a* alleles facilitated in rice domestication? (a) Haplotype

data used in this analysis. (b) Five polymorphisms on exon 1 and four on exon 3 were mapped with

the domestication genotypes of *qSW5*, *Wx*, and *qSH1* genes. A *Gn1a* allele with a haplotype with five blue bars became dominant only in temperate *japonica* after crossing between *qsw5* and *wx* in China (or Japan). Note that most *Gn1a* in *indica* contains the null allele, as represented by the red at InDel1 on exon 1<sup>24</sup>.

Supplementary Table 1 Data used for association analysis in Fig.2g

| qSW5 haplotype (cultivar number) | Landrace name      | average width (pixel) | average width (mm) | average length (pixel) | average length (mm) | ratio (length/width) |
|----------------------------------|--------------------|-----------------------|--------------------|------------------------|---------------------|----------------------|
| Indica II (10)                   | ARC 7291           | 453.9                 | 2.75               | 1092.9                 | 6.62                | 2.69                 |
|                                  | Nepal 8            | 508.2                 | 3.08               | 1175.0                 | 7.12                | 2.31                 |
|                                  | Jena 035           | 512.4                 | 3.11               | 1340.2                 | 8.12                | 2.62                 |
|                                  | Puluik Arang       | 516.9                 | 3.13               | 1519.8                 | 9.21                | 2.94                 |
|                                  | Co13               | 528.3                 | 3.20               | 1205.6                 | 7.31                | 2.28                 |
|                                  | Ryou Suisan Koumai | 529.3                 | 3.21               | 1181.4                 | 7.16                | 2.23                 |
|                                  | Kalo Dhan          | 540.3                 | 3.27               | 1228.1                 | 7.44                | 2.27                 |
|                                  | Davao 1            | 544.6                 | 3.30               | 1189.8                 | 7.21                | 2.19                 |
|                                  | Jinguoin           | 552.3                 | 3.35               | 1343.0                 | 8.14                | 2.43                 |
|                                  | HASSOKUHO          | 571.9                 | 3.47               | 1234.1                 | 7.48                | 2.16                 |
|                                  | Nipponbare (44)    | Tupa729               | 514.5              | 3.12                   | 1176.9              | 7.13                 |
| JOUSHUU                          |                    | 526.5                 | 3.19               | 1114.0                 | 6.75                | 2.12                 |
| BOUZU MOCHI                      |                    | 535.6                 | 3.25               | 1283.7                 | 7.78                | 2.40                 |
| AKAMAI                           |                    | 547.5                 | 3.32               | 1096.1                 | 6.64                | 2.00                 |
| ISHIJIRO                         |                    | 550.3                 | 3.34               | 1134.7                 | 6.88                | 2.06                 |

|  |                        |       |      |        |      |      |
|--|------------------------|-------|------|--------|------|------|
|  | HOSOGARA               | 556.0 | 3.37 | 1072.8 | 6.50 | 1.93 |
|  | DANGO                  | 557.1 | 3.38 | 1059.6 | 6.42 | 1.90 |
|  | Nipponbare             | 559.8 | 3.39 | 1130.3 | 6.85 | 2.02 |
|  | MANSAKU                | 563.5 | 3.42 | 1141.0 | 6.92 | 2.03 |
|  | Jaguary                | 565.0 | 3.42 | 1548.9 | 9.39 | 2.74 |
|  | NAGOYA SHIRO           | 565.6 | 3.43 | 1057.4 | 6.41 | 1.87 |
|  | AKAGE                  | 568.7 | 3.45 | 1161.5 | 7.04 | 2.05 |
|  | HIMENOMOCHI            | 573.7 | 3.48 | 1118.9 | 6.78 | 1.95 |
|  | SHINYAMADAHO<br>2      | 575.0 | 3.48 | 1049.5 | 6.36 | 1.83 |
|  | HINODE                 | 575.9 | 3.49 | 1282.3 | 7.77 | 2.23 |
|  | RIKUTOU RIKUU 2        | 577.8 | 3.50 | 1126.7 | 6.83 | 1.95 |
|  | MORITA WASE            | 578.0 | 3.50 | 1165.1 | 7.06 | 2.02 |
|  | KAMEJI                 | 578.0 | 3.50 | 1078.4 | 6.54 | 1.87 |
|  | AIKOKU                 | 579.6 | 3.51 | 1043.6 | 6.32 | 1.80 |
|  | AKAMAI                 | 582.3 | 3.53 | 1327.6 | 8.05 | 2.28 |
|  | Urasan 1               | 583.1 | 3.53 | 1319.4 | 8.00 | 2.27 |
|  | FUKOKU                 | 584.3 | 3.54 | 1110.1 | 6.73 | 1.90 |
|  | OMACHI                 | 584.9 | 3.54 | 1131.9 | 6.86 | 1.94 |
|  | SHICHIMENCHOU<br>MOCHI | 584.9 | 3.55 | 1163.3 | 7.05 | 1.99 |
|  | OKABO                  | 585.2 | 3.55 | 1372.8 | 8.32 | 2.35 |
|  | MEGURO MOCHI           | 588.2 | 3.57 | 1256.5 | 7.62 | 2.14 |
|  | HIYADACHITOU           | 591.6 | 3.59 | 1111.5 | 6.74 | 1.88 |
|  | SHIROINE(KEMOM<br>I)   | 592.1 | 3.59 | 1095.1 | 6.64 | 1.85 |
|  | GINBOUZU               | 592.2 | 3.59 | 1122.7 | 6.80 | 1.90 |
|  | KAHEI                  | 594.4 | 3.60 | 1347.8 | 8.17 | 2.27 |
|  | KYOUTOASAHI            | 596.3 | 3.61 | 1115.7 | 6.76 | 1.87 |
|  | SHINRIKI               | 596.7 | 3.62 | 1157.2 | 7.01 | 1.94 |
|  | GAISEN MOCHI           | 598.6 | 3.63 | 1470.9 | 8.91 | 2.46 |
|  | KANEKO                 | 599.0 | 3.63 | 1245.4 | 7.55 | 2.08 |
|  | SEKIYAMA               | 605.3 | 3.67 | 1069.7 | 6.48 | 1.77 |
|  | HAKAMURI(YOKO<br>YAMA) | 607.0 | 3.68 | 1291.0 | 7.82 | 2.13 |
|  | SENSHOU                | 609.0 | 3.69 | 1247.2 | 7.56 | 2.05 |
|  | KABASHIKO              | 611.7 | 3.71 | 1142.9 | 6.93 | 1.87 |



|                  | YAMADA BAKE                    | 619.2                    | 3.75                  | 1173.1                       | 7.11                      | 1.90                    |
|------------------|--------------------------------|--------------------------|-----------------------|------------------------------|---------------------------|-------------------------|
|                  | SHINRIKI MOCHI                 | 621.2                    | 3.76                  | 1082.6                       | 6.56                      | 1.74                    |
|                  | OIRAN                          | 623.0                    | 3.78                  | 1289.9                       | 7.82                      | 2.07                    |
|                  | IRIMA NISHIKI                  | 636.6                    | 3.86                  | 1262.0                       | 7.65                      | 1.98                    |
|                  | Khao Nok                       | 667.6                    | 4.05                  | 1361.1                       | 8.25                      | 2.04                    |
|                  | HIRAYAMA                       | 670.6                    | 4.06                  | 1176.4                       | 7.13                      | 1.87                    |
|                  |                                |                          |                       |                              |                           |                         |
| Kasalath<br>(30) | Cultivar name                  | average width<br>(pixel) | average width<br>(mm) | average<br>length<br>(pixel) | average<br>length<br>(mm) | ratio<br>(length/width) |
|                  | Basilanon                      | 415.7                    | 2.52                  | 1236.4                       | 7.49                      | 2.98                    |
|                  | Surjamukhi                     | 422.2                    | 2.56                  | 1329.3                       | 8.06                      | 3.15                    |
|                  | Rexmont                        | 428.1                    | 2.59                  | 1550.1                       | 9.39                      | 3.62                    |
|                  | Tadukan                        | 428.4                    | 2.60                  | 1257.6                       | 7.62                      | 2.94                    |
|                  | IR 58                          | 429.5                    | 2.60                  | 1325.6                       | 8.03                      | 3.09                    |
|                  | ARC 5955                       | 436.5                    | 2.65                  | 1133.0                       | 6.87                      | 2.60                    |
|                  | Anjana Dhan                    | 439.5                    | 2.66                  | 1364.8                       | 8.27                      | 3.11                    |
|                  | Tupa 121-3                     | 446.4                    | 2.71                  | 1329.4                       | 8.06                      | 2.98                    |
|                  | Kasalath                       | 446.8                    | 2.71                  | 1219.4                       | 7.39                      | 2.73                    |
|                  | Naba                           | 447.4                    | 2.71                  | 1322.8                       | 8.02                      | 2.96                    |
|                  | Bei Khe                        | 449.2                    | 2.72                  | 1381.9                       | 8.38                      | 3.08                    |
|                  | Jhona 2                        | 455.6                    | 2.76                  | 1517.7                       | 9.20                      | 3.34                    |
|                  | Asu                            | 460.4                    | 2.79                  | 1222.8                       | 7.41                      | 2.66                    |
|                  | Jarjan                         | 468.4                    | 2.84                  | 1329.1                       | 8.06                      | 2.84                    |
|                  | Lebed                          | 470.2                    | 2.85                  | 1227.6                       | 7.44                      | 2.61                    |
|                  | Pinulupot 1                    | 474.2                    | 2.87                  | 1266.3                       | 7.67                      | 2.67                    |
|                  | Ma sho                         | 475.7                    | 2.88                  | 1163.4                       | 7.05                      | 2.45                    |
|                  | Muha                           | 476.5                    | 2.89                  | 1497.2                       | 9.07                      | 3.14                    |
|                  | AKAMAI                         | 478.3                    | 2.90                  | 1337.4                       | 8.11                      | 2.80                    |
|                  | AKAMAI                         | 480.1                    | 2.91                  | 1348.8                       | 8.17                      | 2.81                    |
|                  | Nepal 555                      | 482.3                    | 2.92                  | 1208.5                       | 7.32                      | 2.51                    |
|                  | TOUBOSHI                       | 484.3                    | 2.94                  | 1314.4                       | 7.97                      | 2.72                    |
|                  | Milyang 23                     | 493.5                    | 2.99                  | 1301.8                       | 7.89                      | 2.64                    |
|                  | Kaluheenati                    | 497.4                    | 3.01                  | 1229.1                       | 7.45                      | 2.47                    |
|                  | Deng Pao Zhai<br>(Toufutsusai) | 505.4                    | 3.06                  | 1247.9                       | 7.56                      | 2.47                    |

|  |               |       |      |        |      |      |
|--|---------------|-------|------|--------|------|------|
|  | OKKA MODOSHI  | 507.1 | 3.07 | 1372.8 | 8.32 | 2.71 |
|  | Shuusoushu    | 518.3 | 3.14 | 1366.9 | 8.28 | 2.64 |
|  | WATARIBUNE    | 540.7 | 3.28 | 1210.6 | 7.34 | 2.24 |
|  | KARAOUSHI     | 552.9 | 3.35 | 1364.5 | 8.27 | 2.47 |
|  | Shwe Nang Gyi | 580.5 | 3.52 | 1485.0 | 9.00 | 3.20 |

Supplementary Table 2 Genotype of FNPs in three domestication genes for 142 landraces

| Landrace No. | WRC No. | Local Origin | Name                           | qSW5/FNP        | Waxy/FNP | qSH1/FNP |
|--------------|---------|--------------|--------------------------------|-----------------|----------|----------|
| 1            | WRC 35  | IND          | ARC 5955                       | Kasalath        | G        | G        |
| 2            | WRC 02  | IND          | Kasalath                       | Kasalath        | G        | G        |
| 3            | WRC 36  | IND          | Ratul                          | Kasalath        | G        | G        |
| 4            | WRC 41  | LKA          | Kaluheenati                    | Kasalath        | G        | G        |
| 5            | WRC 40  | IND          | Nepal 555                      | Kasalath        | G        | G        |
| 6            | WRC 34  | IND          | ARC 7291                       | Indica type II  | G        | G        |
| 7            | WRC 33  | IND          | Surjamukhi                     | Kasalath        | G        | G        |
| 8            | WRC 32  | BGD          | Tupa 121-3                     | Kasalath        | G        | G        |
| 9            | WRC 30  | NPL          | Anjana Dhan                    | Kasalath        | G        | G        |
| 10           | WRC 29  | NPL          | Kalo Dhan                      | Indica type II  | G        | G        |
| 11           | WRC 04  | NPL          | Jena 035                       | Indica type II  | G        | G        |
| 12           | WRC 28  | BTN          | Jarjan                         | Kasalath        | G        | G        |
| 13           | WRC 27  | NPL          | Nepal 8                        | Indica type II  | G        | G        |
| 14           | WRC 26  | IND          | Jhona 2                        | Kasalath        | G        | G        |
| 15           | WRC 25  | IDN          | Muha                           | Kasalath        | G        | G        |
| 16           | WRC 14  | PHL          | IR 58                          | Kasalath        | G        | G        |
| 17           | WRC 20  | PHL          | Tadukan                        | Kasalath        | G        | G        |
| 18           | WRC 11  | CHN          | Jinguoin                       | Indica type II  | G        | G        |
| 19           | WRC 19  | CHN          | Deng Pao Zhai<br>(Toufutsusai) | Kasalath        | G        | G        |
| 20           | WRC 15  | IND          | Co 13                          | Indica type II  | G        | G        |
| 21           | WRC 13  | BTN          | Asu                            | Kasalath        | G        | G        |
| 22           | WRC 06  | IDN          | Puluik Arang                   | Indica type II  | T        | G        |
| 23           | WRC 10  | CHN          | Shuusoushu                     | Kasalath        | G        | G        |
| 24           | WRC 05  | IND          | Naba                           | Kasalath        | G        | G        |
| 25           | WRC 17  | CHN          | Keiboba                        | Indica type III | G        | G        |

|    |        |     |                       |                 |   |   |
|----|--------|-----|-----------------------|-----------------|---|---|
| 26 | WRC 09 | CHN | Ryou Suisan<br>Koumai | Indica type II  | G | G |
| 27 | WRC 03 | CMB | Bei Khe               | Kasalath        | G | G |
| 28 | WRC 07 | PHL | Davao 1               | Indica type II  | G | G |
| 29 | WRC 24 | PHL | Pinulupot 1           | Kasalath        | G | G |
| 30 | WRC 23 | PHL | Lebed                 | Kasalath        | T | G |
| 31 | WRC 44 | PHL | Basilanon             | Kasalath        | G | G |
| 32 | WRC 43 | CHN | Dianyu 1              | Nipponbare      | T | T |
| 33 | WRC 55 | BGD | Tupa729               | Nipponbare      | G | G |
| 34 |        | BGD | Kaloshahaita          | Nipponbare      | G | G |
| 35 |        | BGD | Tupa7-1               | Nipponbare      | G | G |
| 36 | WRC 53 | BTN | Tima                  | Nipponbare      | G | G |
| 37 |        | MYS | Turakin               | Kasalath        | G | G |
| 38 |        | MYS | Puteh/Rubon(H)        | Kasalath        | G | G |
| 39 |        | LKA | Godawee               | Nipponbare      | G | G |
| 40 |        | PHL | Kinan Kuda            | Nipponbare      | G | G |
| 41 |        | PHL | Binatangan 2          | Nipponbare      | G | G |
| 42 |        | PHL | Bincol<br>(aromatic)  | Nipponbare      | G | G |
| 43 |        | PHL | Canabong bong         | Nipponbare      | G | G |
| 44 |        | PHL | Calutos               | Kasalath        | G | G |
| 45 |        | IDN | Masumikir             | Kasalath        | G | G |
| 46 |        | IDN | Siampang              | Kasalath        | G | G |
| 47 |        | IDN | Bodat Mayang          | Kasalath        | G | G |
| 48 |        | IDN | Padi Kenikir Puti     | Kasalath        | G | G |
| 49 |        | IDN | Simanoek              | Indica type II  | G | G |
| 50 |        | IDN | Ladang                | Nipponbare      | G | G |
| 51 | WRC 67 | IND | Phulba                | Nipponbare      | G | G |
| 52 |        | CHN | Haohai                | Nipponbare      | G | G |
| 53 | WRC 45 | MYN | Ma sho                | Indica type III | G | G |
| 54 |        | MYN | Khauk Yoe             | Kasalath        | G | G |
| 55 |        | CHN | Bayuenuo              | Nipponbare      | T | G |
| 56 |        | VNM | Mu Bang Gu            | Kasalath        | G | G |
| 57 |        | VNM | Khau Van Lanh         | Nipponbare      | T | G |
| 58 |        | VNM | Bie Blau              | Nipponbare      | T | G |
| 59 |        | MYN | In Sitt               | Nipponbare      | G | G |
| 60 | WRC 48 | VNM | Khau Mac Kho          | Nipponbare      | T | G |

|    |        |        |                      |                |   |   |
|----|--------|--------|----------------------|----------------|---|---|
| 61 |        | VNM    | Cha Sen Lun          | Nipponbare     | T | G |
| 62 |        | VNM    | Ngo Luu              | Nipponbare     | T | G |
| 63 |        | LAO    | Khao Monh            | Nipponbare     | T | G |
| 64 |        | LAO    | Khao Vay Deng        | Nipponbare     | T | G |
| 65 |        | THA    | Daw Dam              | Nipponbare     | T | G |
| 66 |        | LAO    | Mack Kheua           | Nipponbare     | T | G |
| 67 |        | LAO    | Dam Ngo              | Nipponbare     | T | G |
| 68 |        | LAO    | Deng Mak Tek         | Nipponbare     | T | G |
| 69 |        | LAO    | Lep Xang             | Nipponbare     | T | G |
| 70 |        | CHN    | Dabagu               | Nipponbare     | G | T |
| 71 |        | CHN    | Haogang              | Kasalath       | T | G |
| 72 |        | MYN    | Shwe War             | Nipponbare     | G | G |
| 73 |        | THA    | KU 70-1              | Nipponbare     | T | G |
| 74 | WRC 46 | LAO    | Khao Nok             | Nipponbare     | T | G |
| 75 |        | BGD    | Aus 38               | Nipponbare     | T | G |
| 76 |        | BTN    | Kochum               | Kasalath       | G | G |
| 77 |        | IDN    | Simedel              | Indica type II | G | G |
| 78 |        | JPN(U) | Kahei                | Nipponbare     | T | G |
| 79 |        | JPN(U) | Aka Yakan            | Kasalath       | T | G |
| 80 | WRC 51 | JPN(U) | Urasan I             | Nipponbare     | T | G |
| 81 |        | JPN(U) | Mie                  | Nipponbare     | G | G |
| 82 |        | JPN(U) | Bansei Tarou         | Nipponbare     | T | G |
| 83 |        | JPN(U) | Tamasari             | Nipponbare     | G | G |
| 84 |        | JPN(U) | Wase Sekitori F      | Nipponbare     | G | G |
| 85 | WRC 68 | LAO    | Khao Nam Jen         | Nipponbare     | T | G |
| 86 | WRC 52 | VNM    | Khau Tan Chiem       | Kasalath       | T | G |
| 87 |        | BTN    | 91-385               | Kasalath       | T | G |
| 88 |        | PHL    | Dinalaga             | Nipponbare     | T | G |
| 89 |        | CHN    | Ligihong             | Nipponbare     | G | T |
| 90 |        | CHN    | Naxi                 | Nipponbare     | G | T |
| 91 |        | CHN    | Laolaihong           | Nipponbare     | G | T |
| 92 |        | CHN    | Xiaobaigu            | Nipponbare     | G | T |
| 93 |        | CHN    | Dabaigu              | Nipponbare     | T | G |
| 94 |        | CHN    | Wahuigu              | Nipponbare     | G | T |
| 95 |        | CHN    | Shoutan Zairai       | Nipponbare     | G | G |
| 96 |        | CHN    | Moch Ine<br>Sukensan | Nipponbare     | T | G |

|     |        |     |                           |            |   |   |
|-----|--------|-----|---------------------------|------------|---|---|
| 97  |        | CHN | North China 60            | Nipponbare | T | G |
| 98  |        | CHN | Sousen                    | Nipponbare | T | G |
| 99  |        | CHN | Chuumoushi                | Nipponbare | G | G |
| 100 |        | CHN | Aijiaonuo                 | Nipponbare | T | G |
| 101 |        | CHN | Nanjingxiangtao           | Kasalath   | T | G |
| 102 |        | PHL | Sinaba                    | Nipponbare | G | G |
| 103 |        | PHL | Curikit                   | Nipponbare | T | G |
| 104 |        | IND | K78                       | Nipponbare | G | G |
| 105 |        | CHN | China 830                 | Nipponbare | G | T |
| 106 |        | JPN | Ochikara                  | Nipponbare | T | T |
| 107 |        | CHN | Kamochi<br>Kantonfukinsan | Kasalath   | T | G |
| 108 |        | CHN | Chuutou                   | Nipponbare | T | G |
| 109 |        | IND | RM                        | Kasalath   | T | G |
| 110 |        | JPN | Hokuto                    | Nipponbare | T | T |
| 111 |        | JPN | Wasekouriki               | Nipponbare | T | G |
| 112 |        | JPN | Soushin 23                | Nipponbare | T | G |
| 113 |        | JPN | Akage                     | Nipponbare | T | T |
| 114 |        | JPN | Komehikari                | Nipponbare | T | T |
| 115 |        | JPN | Toyonishiki               | Nipponbare | T | T |
| 116 |        | JPN | Shinsyukaneko             | Nipponbare | T | T |
| 117 |        | JPN | Shinsyu                   | Nipponbare | T | T |
| 118 |        | JPN | Kinuhikari                | Nipponbare | T | T |
| 119 |        | JPN | Koshihikari               | Nipponbare | T | T |
| 120 |        | JPN | Ginbozu                   | Nipponbare | T | T |
| 121 |        | JPN | Akiahikari                | Nipponbare | T | T |
| 122 |        | JPN | Shinriki                  | Nipponbare | T | G |
| 123 |        | JPN | Asominori                 | Nipponbare | T | G |
| 124 |        | JPN | Chouhyouroku 1            | Nipponbare | T | G |
| 125 | WRC 01 | JPN | Nipponbare                | Nipponbare | T | T |
| 126 |        | JPN | Norin 1                   | Nipponbare | T | T |
| 127 |        | JPN | Asahi                     | Nipponbare | T | G |
| 128 |        | JPN | Sasanishiki               | Nipponbare | T | T |
| 129 |        | JPN | Shirakawa                 | Nipponbare | T | T |
| 130 |        | JPN | Fujisaka 5                | Nipponbare | T | G |
| 131 |        | JPN | Sekiyama                  | Nipponbare | T | T |
| 132 |        | JPN | Oba                       | Nipponbare | T | T |

|     |     |                |            |   |   |
|-----|-----|----------------|------------|---|---|
| 133 | JPN | Tamanishiki    | Nipponbare | T | T |
| 134 | JPN | Jikkoku        | Nipponbare | T | T |
| 135 | JPN | Norin 8        | Nipponbare | T | T |
| 136 | JPN | Norin 29       | Nipponbare | T | T |
| 137 | JPN | Kokuryoumiyako | Nipponbare | T | G |
| 138 | JPN | Banzai         | Nipponbare | T | G |
| 139 | JPN | Kameji         | Nipponbare | T | T |
| 140 | JPN | Kogyoku        | Nipponbare | T | T |
| 141 | PHL | CS-S4          | Nipponbare | T | G |
| 142 | BTN | 91-382         | Nipponbare | T | G |

Supplementary Table 3 Primer information used in this work

| mapping marker name | upper primer sequence                      | lower primer sequence                      | marker type             |
|---------------------|--------------------------------------------|--------------------------------------------|-------------------------|
| MS35029             | 5'-CCGGGCGTACCT<br>GTACTACT-3'             | 5'-TACTATCATCCT<br>TTCGTCCTTGG-3'          | SSR                     |
| MS40671             | 5'-TTTGATTGCCAT<br>TATCGAGTTAG-3'          | 5'-GTGTGCGTGAAG<br>AGAACAGT-3'             | Indel                   |
| N1212del            | 5'-CGTCTTGCAACC<br>AACGCCGATGTTA<br>TAC-3' | 5'-GAGCGTGTGTAG<br>GGAAGGAGCTGCA<br>TGA-3' | Indel                   |
| M15                 | -                                          | -                                          | SNP direct sequencing   |
| M16                 | -                                          | -                                          | SNP direct sequencing   |
| M17                 | -                                          | -                                          | SNP direct sequencing   |
| M18                 | -                                          | -                                          | Indel direct sequencing |
| M23                 | 5'-GATCGAATCCCG<br>TGGTGATAAAC-3'          | 5'-GCATCAGCATCA<br>CGCATCTTTC-3'           | Indel                   |
| GR42739             | 5'-CGAAACTTAATT<br>TGACCATTGAA-3'          | 5'-CATCTTCCGTAA<br>AGAAACTCAGG-3'          | Indel                   |
| GR43920             | 5'-GGATCGGGAAG<br>AGACAGATTACC-3'          | 5'-CGCATTTTTGGG<br>AGGAAGTAGAA-3'          | CAPS HhaI               |
| GR48346             | 5'-GATATTTTCAGGT<br>CGGGAGTGG-3'           | 5'-AGGCAAGATAG<br>GTGATGATTTGA-3'          | CAPS AfaI               |

|                                |                                         |                                  |     |
|--------------------------------|-----------------------------------------|----------------------------------|-----|
| MS1898                         | 5'-GTATTCAATTT<br>CAAGCCTCCTG-3'        | 5'-TTTTCTTTTCTTT<br>CCTGGCATC-3' | SSR |
| ORF RT-PCR primer<br>name      |                                         |                                  |     |
| predicted ORF1F                | 5'-TGGGATATGGAA<br>TGGAATGGGTTGG-<br>3' |                                  |     |
| predicted ORF1R                | 5'-GATAGGGGTGG<br>GGATGGGATGAAT<br>G-3' |                                  |     |
| predicted ORF2F                | 5'-TTCTTCCCAGAT<br>CCAGGACGAGGTG<br>-3' |                                  |     |
| predicted ORF2R                | 5'-GCGAGCGAGCG<br>TGTGTAGGGAAG-3'       |                                  |     |
| predicted ORF3F                | 5'-ATGTTGACGTTG<br>TGTGTTGGCGATG-<br>3' |                                  |     |
| predicted ORF3R                | 5'-TCTTGAAGTTGA<br>ACGCCTCCTGCAC-<br>3' |                                  |     |
| RT-PCR Southern<br>primer name |                                         |                                  |     |
| predicted ORF1SF               | 5'-GCTCGCCAAGTT<br>GCCGGCTGCAC-3'       |                                  |     |
| predicted ORF1SR               | 5'-GCATGAGCGGG<br>CGGAGGAGGACTA<br>-3'  |                                  |     |
| predicted ORF2SF               | 5'-GCTCGCCAAGTT<br>GCCGGCTGCAC-3'       |                                  |     |
| predicted ORF2SR               | 5'-GCATGAGCGGG<br>CGGAGGAGGACTA<br>-3'  |                                  |     |

|                  |                                            |  |  |
|------------------|--------------------------------------------|--|--|
| predicted ORF3SF | 5'-ATGTTGACGTTG<br>TGTGTTGGCGATG-<br>3'    |  |  |
| predicted ORF3SR | 5'-TCTTGAAGTTGA<br>ACGCCTCCTGCAC-<br>3'    |  |  |
| U06              | 5'-GCTCGCCAAGTT<br>GCCGGCTGCAC-3'          |  |  |
| U03              | 5'-TTCTTCCCAGAT<br>CCAGGACGAGGTG<br>-3'    |  |  |
| U01              | 5'-TGGGATATGGAA<br>TGGAATGGGTTGG-<br>3'    |  |  |
| U1               | 5'-GAAGTTGATTTT<br>ATGATATGCTCAA<br>CGT-3' |  |  |
| U2               | 5'-CATCATCAATCA<br>CGCAATATGGTCT<br>ACT-3' |  |  |
| U3               | 5'-CATGCTTTGTAC<br>CCCTTGTAGGATG<br>CAT-3' |  |  |
| L03              | 5'-CGGTGTCCAAGT<br>GCCGTCCTCTT-3'          |  |  |
| L04              | 5'-GCGAGCGAGCG<br>TGTGTAGGGAAG-3'          |  |  |
| L08              | 5'-GATAGGGGTGG<br>GGATGGGATGAAT<br>G-3'    |  |  |
| L1               | 5'-GTGGGATAGGAT<br>GAAACCATACATG-<br>3'    |  |  |
| L5               | 5'-GTTATAAACCAT<br>GTGCTCATAAGCT<br>TTC-3' |  |  |



|                           |                                             |          |  |
|---------------------------|---------------------------------------------|----------|--|
| L3                        | 5'-GAGTCTATGGAG<br>TTAAGTCTAAGAT<br>CTG-3'  |          |  |
| L1                        | 5'-CGATCGAGATGA<br>GGCGGGGCAGCAA<br>-3'     |          |  |
| qRT-PCR primer name       |                                             |          |  |
| F                         | 5'-TCCATCAAAGTG<br>GGATGGATTAG-3'           |          |  |
| R                         | 5'-CTTCCCAGATCC<br>AGGACGAG-3'              |          |  |
| Taq man probe for<br>qSW5 | 5'FAM-TGGTCCGCC<br>AAAATCGGCTGG-T<br>AMRA3' |          |  |
|                           |                                             |          |  |
| PCR kit                   | TAKARA LA Taq<br>weth GC buffer I           |          |  |
|                           |                                             |          |  |
| 94°C                      | 5min                                        |          |  |
| 94°C                      | 45sec                                       |          |  |
| 65°C                      | 45sec                                       | 30cycles |  |
| 72°C                      | 2min                                        |          |  |
| 72°C                      | 10min                                       |          |  |
| 4°C                       | ∞                                           |          |  |
